# Supplementary figures and images for: Feline Parvovirus Lethal Outbreak in a Group of Adult Cohabiting Domestic Cats
Source: MDPI journal article supplement (doi:10.3390/pathogens12060822), 2023-06-11

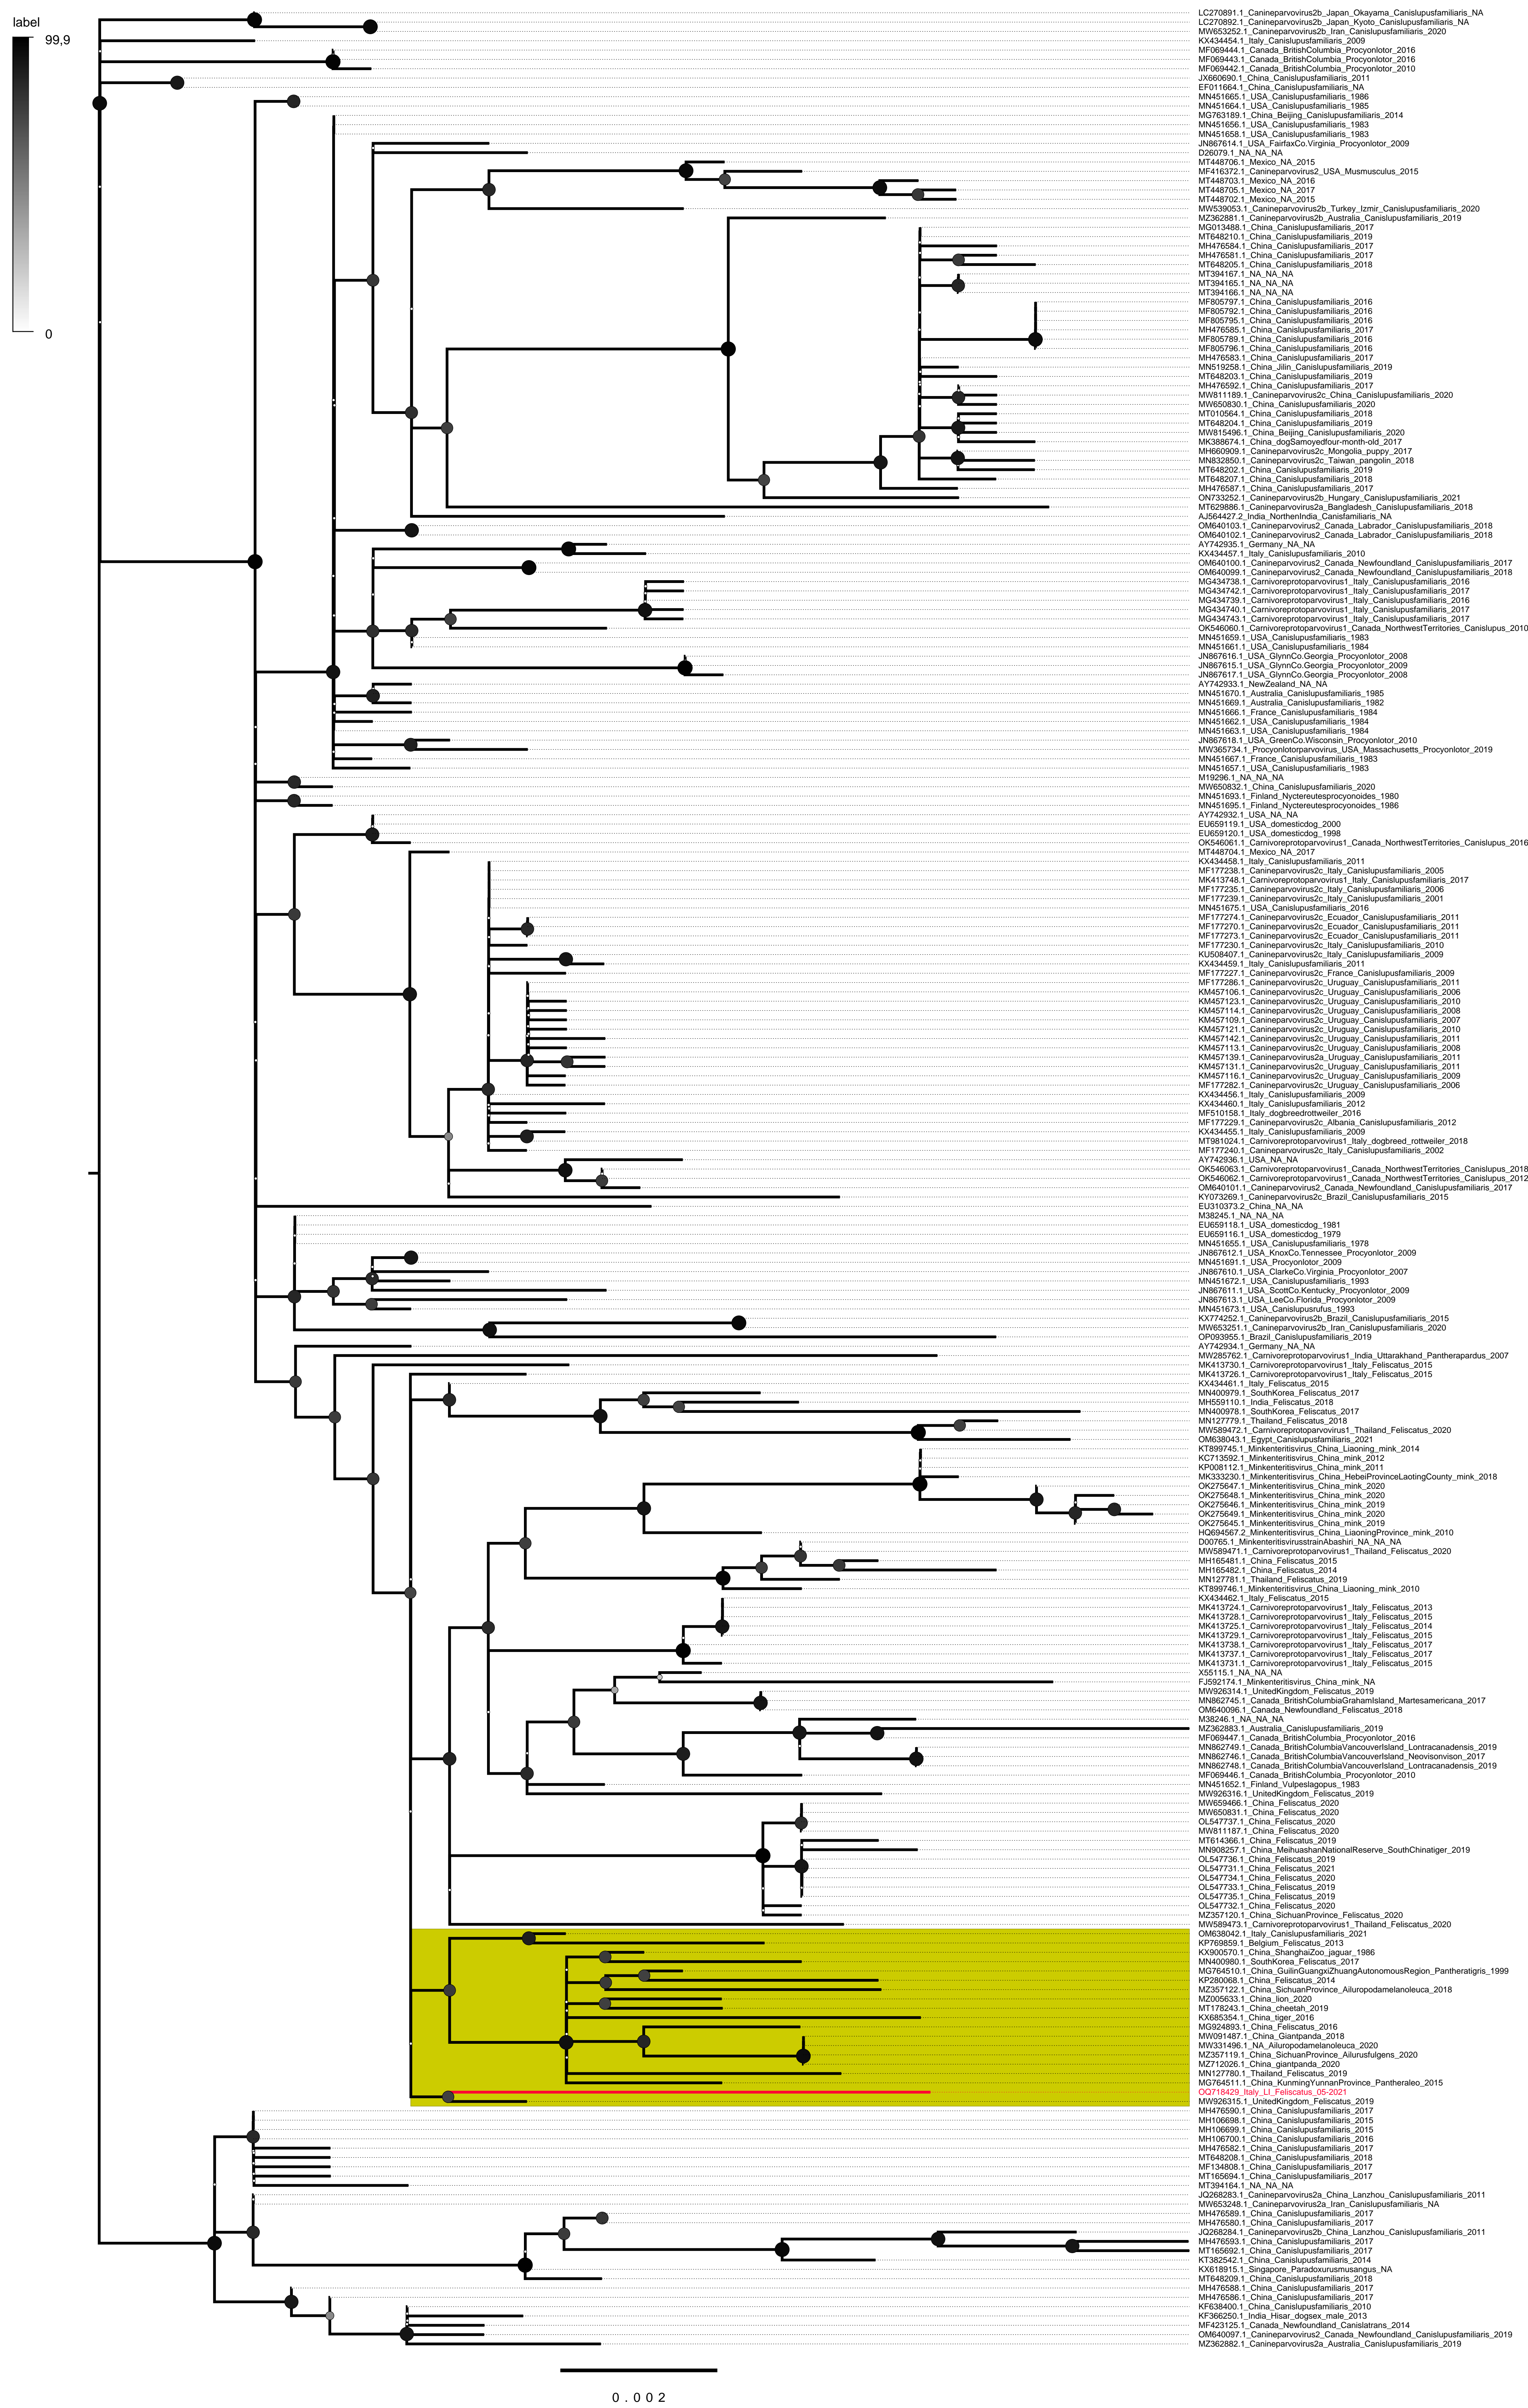

Supplement: s1 [file s1]
